# Supplementary material
Source: HighWire-hosted journal article supplement (https://www.cmajopen.ca/highwire/filestream/81239/field_highwire_adjunct_files/3/reviewer-comments-2018-0151.pdf)
Supplement: reviewer-comments-2018-0151.pdf [file reviewer-comments-2018-0151.pdf]

|                                            |                                                                                                                                                                                                                                                                                                                                                                                                                                                                                                                                                                                                                                                                                                                                                                                                                                                                                                                                                                                                                                                                                                                                                                                                                                                                                                                                                                                                                                                                                                                                                                                                                                                                                                                                                                                                                                                                                                                                                                                                                                                                                                                                                                                                                                                                                                                                                                                                                                                                                                                                                                                                                                                                                                                                                                                                                                                                                                                                                                                                                                                                                                                                                                                                                                                                                                                                                                                                                                                                                                                                                                                                                                                                                                                                                                                                                                                                                                                                                                                                                                                                                                                                                                                                                                                                                                                                                                                                                                                                                                                                                                                                                                                                                                                                                                                                                                                                                                                                                                                                                                                                                                                                                                                                                                                                                                                                                    |
|--------------------------------------------|----------------------------------------------------------------------------------------------------------------------------------------------------------------------------------------------------------------------------------------------------------------------------------------------------------------------------------------------------------------------------------------------------------------------------------------------------------------------------------------------------------------------------------------------------------------------------------------------------------------------------------------------------------------------------------------------------------------------------------------------------------------------------------------------------------------------------------------------------------------------------------------------------------------------------------------------------------------------------------------------------------------------------------------------------------------------------------------------------------------------------------------------------------------------------------------------------------------------------------------------------------------------------------------------------------------------------------------------------------------------------------------------------------------------------------------------------------------------------------------------------------------------------------------------------------------------------------------------------------------------------------------------------------------------------------------------------------------------------------------------------------------------------------------------------------------------------------------------------------------------------------------------------------------------------------------------------------------------------------------------------------------------------------------------------------------------------------------------------------------------------------------------------------------------------------------------------------------------------------------------------------------------------------------------------------------------------------------------------------------------------------------------------------------------------------------------------------------------------------------------------------------------------------------------------------------------------------------------------------------------------------------------------------------------------------------------------------------------------------------------------------------------------------------------------------------------------------------------------------------------------------------------------------------------------------------------------------------------------------------------------------------------------------------------------------------------------------------------------------------------------------------------------------------------------------------------------------------------------------------------------------------------------------------------------------------------------------------------------------------------------------------------------------------------------------------------------------------------------------------------------------------------------------------------------------------------------------------------------------------------------------------------------------------------------------------------------------------------------------------------------------------------------------------------------------------------------------------------------------------------------------------------------------------------------------------------------------------------------------------------------------------------------------------------------------------------------------------------------------------------------------------------------------------------------------------------------------------------------------------------------------------------------------------------------------------------------------------------------------------------------------------------------------------------------------------------------------------------------------------------------------------------------------------------------------------------------------------------------------------------------------------------------------------------------------------------------------------------------------------------------------------------------------------------------------------------------------------------------------------------------------------------------------------------------------------------------------------------------------------------------------------------------------------------------------------------------------------------------------------------------------------------------------------------------------------------------------------------------------------------------------------------------------------------------------------------------------------------------|
| <b>Article details: 2018-0151</b>          |                                                                                                                                                                                                                                                                                                                                                                                                                                                                                                                                                                                                                                                                                                                                                                                                                                                                                                                                                                                                                                                                                                                                                                                                                                                                                                                                                                                                                                                                                                                                                                                                                                                                                                                                                                                                                                                                                                                                                                                                                                                                                                                                                                                                                                                                                                                                                                                                                                                                                                                                                                                                                                                                                                                                                                                                                                                                                                                                                                                                                                                                                                                                                                                                                                                                                                                                                                                                                                                                                                                                                                                                                                                                                                                                                                                                                                                                                                                                                                                                                                                                                                                                                                                                                                                                                                                                                                                                                                                                                                                                                                                                                                                                                                                                                                                                                                                                                                                                                                                                                                                                                                                                                                                                                                                                                                                                                    |
| Title                                      | Cervical cancer screening among women living with HIV: a cross-sectional study using the baseline questionnaire data from the Canadian HIV Women's Sexual and Reproductive Health Cohort Study (CHIWO5)                                                                                                                                                                                                                                                                                                                                                                                                                                                                                                                                                                                                                                                                                                                                                                                                                                                                                                                                                                                                                                                                                                                                                                                                                                                                                                                                                                                                                                                                                                                                                                                                                                                                                                                                                                                                                                                                                                                                                                                                                                                                                                                                                                                                                                                                                                                                                                                                                                                                                                                                                                                                                                                                                                                                                                                                                                                                                                                                                                                                                                                                                                                                                                                                                                                                                                                                                                                                                                                                                                                                                                                                                                                                                                                                                                                                                                                                                                                                                                                                                                                                                                                                                                                                                                                                                                                                                                                                                                                                                                                                                                                                                                                                                                                                                                                                                                                                                                                                                                                                                                                                                                                                            |
| Authors                                    | Alexandra de Pokomandy MDCM MSc, Ann N. Burchell PhD, Kate Salters PhD, Erin Ding MSc, Nadia O'Brien MPH, Dada Mamvula Bakombo, Karène Proulx-Boucher MA, Isabelle Boucoiran MD MSc, Neora Pick MD, Gina Ogilvie MD MSc, Mona Loutfy MD MPH, Angela Kaida PhD; for the CHIWO5 Research Team                                                                                                                                                                                                                                                                                                                                                                                                                                                                                                                                                                                                                                                                                                                                                                                                                                                                                                                                                                                                                                                                                                                                                                                                                                                                                                                                                                                                                                                                                                                                                                                                                                                                                                                                                                                                                                                                                                                                                                                                                                                                                                                                                                                                                                                                                                                                                                                                                                                                                                                                                                                                                                                                                                                                                                                                                                                                                                                                                                                                                                                                                                                                                                                                                                                                                                                                                                                                                                                                                                                                                                                                                                                                                                                                                                                                                                                                                                                                                                                                                                                                                                                                                                                                                                                                                                                                                                                                                                                                                                                                                                                                                                                                                                                                                                                                                                                                                                                                                                                                                                                        |
| Reviewer 1                                 | Keyna Bracken                                                                                                                                                                                                                                                                                                                                                                                                                                                                                                                                                                                                                                                                                                                                                                                                                                                                                                                                                                                                                                                                                                                                                                                                                                                                                                                                                                                                                                                                                                                                                                                                                                                                                                                                                                                                                                                                                                                                                                                                                                                                                                                                                                                                                                                                                                                                                                                                                                                                                                                                                                                                                                                                                                                                                                                                                                                                                                                                                                                                                                                                                                                                                                                                                                                                                                                                                                                                                                                                                                                                                                                                                                                                                                                                                                                                                                                                                                                                                                                                                                                                                                                                                                                                                                                                                                                                                                                                                                                                                                                                                                                                                                                                                                                                                                                                                                                                                                                                                                                                                                                                                                                                                                                                                                                                                                                                      |
| Institution                                | Department of Family Medicine, McMaster University, Hamilton, Ont.                                                                                                                                                                                                                                                                                                                                                                                                                                                                                                                                                                                                                                                                                                                                                                                                                                                                                                                                                                                                                                                                                                                                                                                                                                                                                                                                                                                                                                                                                                                                                                                                                                                                                                                                                                                                                                                                                                                                                                                                                                                                                                                                                                                                                                                                                                                                                                                                                                                                                                                                                                                                                                                                                                                                                                                                                                                                                                                                                                                                                                                                                                                                                                                                                                                                                                                                                                                                                                                                                                                                                                                                                                                                                                                                                                                                                                                                                                                                                                                                                                                                                                                                                                                                                                                                                                                                                                                                                                                                                                                                                                                                                                                                                                                                                                                                                                                                                                                                                                                                                                                                                                                                                                                                                                                                                 |
| General comments (author response in bold) | <p>A good study. In the discussion, I would like to see an additional line added after you mention self sampling as one way to potentially improve cervical sampling rates commenting on the current availability and evidence behind self sampling. I know there has been work mailing self sampling kits to women which may work well in this population.</p> <p><b>We fully agree with the reviewer and added a line specifying the benefit for harder to reach women, supported by multiple references (p.13).</b></p> <p>I also think it worth expanding the discussion about why BC with its HIV clinic within BC Women's more effectively reaches the screening guidelines. To me this is representative of 'one stop shopping' whereas the fragmentation of HIV care from primary care , just as with other conditions, leads to situations where the primary care physician feels out of the loop of care and assumes this is being taken care of. Effective communication between HIV care providers and resources allowing HIV care to remain with their PCP such as with other chronic medical conditions, would go along way.</p> <p><b>Yes, we agree with the reviewer and modified our interpretation section accordingly (p.12).</b></p>                                                                                                                                                                                                                                                                                                                                                                                                                                                                                                                                                                                                                                                                                                                                                                                                                                                                                                                                                                                                                                                                                                                                                                                                                                                                                                                                                                                                                                                                                                                                                                                                                                                                                                                                                                                                                                                                                                                                                                                                                                                                                                                                                                                                                                                                                                                                                                                                                                                                                                                                                                                                                                                                                                                                                                                                                                                                                                                                                                                                                                                                                                                                                                                                                                                                                                                                                                                                                                                                                                                                                                                                                                                                                                                                                                                                                                                                                                                                                                                                                                                                                           |
| Reviewer 2                                 | Céline Bouchard                                                                                                                                                                                                                                                                                                                                                                                                                                                                                                                                                                                                                                                                                                                                                                                                                                                                                                                                                                                                                                                                                                                                                                                                                                                                                                                                                                                                                                                                                                                                                                                                                                                                                                                                                                                                                                                                                                                                                                                                                                                                                                                                                                                                                                                                                                                                                                                                                                                                                                                                                                                                                                                                                                                                                                                                                                                                                                                                                                                                                                                                                                                                                                                                                                                                                                                                                                                                                                                                                                                                                                                                                                                                                                                                                                                                                                                                                                                                                                                                                                                                                                                                                                                                                                                                                                                                                                                                                                                                                                                                                                                                                                                                                                                                                                                                                                                                                                                                                                                                                                                                                                                                                                                                                                                                                                                                    |
| Institution                                | Centre Médical Santé Femme, Québec, Que.                                                                                                                                                                                                                                                                                                                                                                                                                                                                                                                                                                                                                                                                                                                                                                                                                                                                                                                                                                                                                                                                                                                                                                                                                                                                                                                                                                                                                                                                                                                                                                                                                                                                                                                                                                                                                                                                                                                                                                                                                                                                                                                                                                                                                                                                                                                                                                                                                                                                                                                                                                                                                                                                                                                                                                                                                                                                                                                                                                                                                                                                                                                                                                                                                                                                                                                                                                                                                                                                                                                                                                                                                                                                                                                                                                                                                                                                                                                                                                                                                                                                                                                                                                                                                                                                                                                                                                                                                                                                                                                                                                                                                                                                                                                                                                                                                                                                                                                                                                                                                                                                                                                                                                                                                                                                                                           |
| General comments (author response in bold) | <p>The subject is of good value and the goal is laudable to verify that Canadian women with HIV are adequately followed for cervical cancer screening and to check the factors that influence the attendance at screening.</p> <p>However, I have some remarks on the definition of the interval:<br/>Current HIV treatment guidelines recommend biannual cervical cytology screening following women's initial HIV diagnosis. If both tests are normal, screening can be reduced to an annual schedule (Fletcher FE et al).<br/>According to the definition of the schedule, "yearly" means between 12 and &lt; 24 months interval. You are using a definition of &lt;12 months which does not meet the recommended standards. Please comment.</p> <p><b>As mentioned above, our reading of cervical cancer screening guidelines differs from that of Reviewer 2. All the guidelines on cervical cancer screening in women living with HIV that we know refer to "annual" or "yearly" screening, meaning every 12 months (<a href="https://aidsinfo.nih.gov/guidelines/html/4/adult-and-adolescent-opportunistic-infection/343/hpv">https://aidsinfo.nih.gov/guidelines/html/4/adult-and-adolescent-opportunistic-infection/343/hpv</a> , <a href="https://www.inspq.qc.ca/pdf/publications/1279_LignesDirectDepistCancerColUterin.pdf">https://www.inspq.qc.ca/pdf/publications/1279_LignesDirectDepistCancerColUterin.pdf</a> , <a href="https://archive.cancercare.on.ca/pcs/screening/cervscreening/screening_guidelines/">https://archive.cancercare.on.ca/pcs/screening/cervscreening/screening_guidelines/</a> , <a href="http://www.bccancer.bc.ca/screening/Documents/CCSP_GuidelinesManual-CervicalCancerScreeningPolicyChangeReferenceGuide.pdf">http://www.bccancer.bc.ca/screening/Documents/CCSP_GuidelinesManual-CervicalCancerScreeningPolicyChangeReferenceGuide.pdf</a> ).</b></p> <p><b>Therefore, strict adherence to the guideline would result in women reporting their last Pap test within 12 months of their interview date.</b></p> <p><b>Nevertheless, we recognise that the category "1-3 years" is broad and would combine delays that would not be perceived as clinically significant (e.g., 14 months) with delays that would be more concerning (e.g., 30 months). We acknowledge this potential misclassification as a limitation in our Discussion. To mitigate this potential for bias, we conducted the analyses with a three-category outcome including an undeniable delay in screening (&gt;=3 years since the last Pap test), and focused our interpretation of findings on associations with these very long delays. We selected this validated question came from the Canadian Community Health Survey and this is why it was worded this way.</b></p> <p>The question (when was the last time you had a Pap test) does not meet the interval definition but the definition of the date of the last pap test. If a woman said that her pap test was done less than 12 months ago, she entered in the "no delay" category and thus joined the reference category. There is no knowledge about the date of the previous test: interval by definition requires evaluation of the time elapsed between 2 documented events. For example, the reference category may have included a woman confirming that her last Pap test was done 8 months ago but the previous one could have been performed 5 years ago. Please comment since the analysis based on this type of information can be inadequate.</p> <p><b>Regrettably, neither the date of the last Pap test, nor the date of the one before that, were measured; therefore, we cannot calculate an interval between two tests. This is why our primary outcome only refers to "delay since the last Pap test", which respects the original wording of the validated question from the Canadian Community Health Survey. We considered that if the current delay since the last Pap test is greater than the recommended 12-month interval, there is a clear "current delay" in cervical cancer screening, which was the focus of our investigation.</b></p> <p>In summary, in your study, the interval is not defined adequately and the group used as reference does not correspond to the definition of "yearly screening" which leads to a significant bias in your results. The "yearly" group corresponding to the currently accepted recommendation is included in group 1 to 3 years, categorized as "moderate delay". As a result, since the questionnaire is not accurate enough to evaluate the "yearly" group, your results cannot be modified. Your discussion should be adapted according to this significant bias.</p> <p><b>We believe that we have adequately responded to this concern in our above responses.</b></p> <p>Lines 205 to 210: this is a repetition of your results and should be removed from the interpretation section or re-commented.</p> <p><b>The reviewer is correct, these lines are a repetition of our results, but we kept them as it is a CMAJ Open requirement: "6. Interpretation: This section should include four parts: a. Brief summary of the main results of the study (one paragraph)" and this is also the recommended format by the International Committee of Journal Editors (ICJE).</b></p> |
| Reviewer 3                                 | Richard Birtwhistle                                                                                                                                                                                                                                                                                                                                                                                                                                                                                                                                                                                                                                                                                                                                                                                                                                                                                                                                                                                                                                                                                                                                                                                                                                                                                                                                                                                                                                                                                                                                                                                                                                                                                                                                                                                                                                                                                                                                                                                                                                                                                                                                                                                                                                                                                                                                                                                                                                                                                                                                                                                                                                                                                                                                                                                                                                                                                                                                                                                                                                                                                                                                                                                                                                                                                                                                                                                                                                                                                                                                                                                                                                                                                                                                                                                                                                                                                                                                                                                                                                                                                                                                                                                                                                                                                                                                                                                                                                                                                                                                                                                                                                                                                                                                                                                                                                                                                                                                                                                                                                                                                                                                                                                                                                                                                                                                |
| Institution                                | Department of Family Medicine and Public Health Sciences, Queen's University, Kingston, Ont.                                                                                                                                                                                                                                                                                                                                                                                                                                                                                                                                                                                                                                                                                                                                                                                                                                                                                                                                                                                                                                                                                                                                                                                                                                                                                                                                                                                                                                                                                                                                                                                                                                                                                                                                                                                                                                                                                                                                                                                                                                                                                                                                                                                                                                                                                                                                                                                                                                                                                                                                                                                                                                                                                                                                                                                                                                                                                                                                                                                                                                                                                                                                                                                                                                                                                                                                                                                                                                                                                                                                                                                                                                                                                                                                                                                                                                                                                                                                                                                                                                                                                                                                                                                                                                                                                                                                                                                                                                                                                                                                                                                                                                                                                                                                                                                                                                                                                                                                                                                                                                                                                                                                                                                                                                                       |
| General comments (author response in bold) | <p>This study was the baseline analysis of interview survey data of women with HIV who agreed to be part of the Canadian HIV Women's and Sexual Health Cohort study. The women attended HIV clinics in BC, Ontario and Quebec. The interviews were done between 2013-15. The inclusion criteria included being cis-gendered, being 20-70 yr of age and having a cervix. The primary objective was to determine whether women were having cervical cancer screening (CCS) frequencies as suggested by screening guidelines. The analysis included both descriptive and multiple regression to determine odds ratios. Of the 1422 women who agreed to participate, 233 were excluded. Of these almost 7% were excluded because they had a crevectomy</p>                                                                                                                                                                                                                                                                                                                                                                                                                                                                                                                                                                                                                                                                                                                                                                                                                                                                                                                                                                                                                                                                                                                                                                                                                                                                                                                                                                                                                                                                                                                                                                                                                                                                                                                                                                                                                                                                                                                                                                                                                                                                                                                                                                                                                                                                                                                                                                                                                                                                                                                                                                                                                                                                                                                                                                                                                                                                                                                                                                                                                                                                                                                                                                                                                                                                                                                                                                                                                                                                                                                                                                                                                                                                                                                                                                                                                                                                                                                                                                                                                                                                                                                                                                                                                                                                                                                                                                                                                                                                                                                                                                                             |

|  |                                                                                                                                                                                                                                                                                                                                                                                                                                                                                                                                                                                                                                                                                                                                                                                                                                                                                                                                                                                                                                                                                                                                                                                                                                                                                                                                                                                                                                                                                                                                                                                                                    |
|--|--------------------------------------------------------------------------------------------------------------------------------------------------------------------------------------------------------------------------------------------------------------------------------------------------------------------------------------------------------------------------------------------------------------------------------------------------------------------------------------------------------------------------------------------------------------------------------------------------------------------------------------------------------------------------------------------------------------------------------------------------------------------------------------------------------------------------------------------------------------------------------------------------------------------------------------------------------------------------------------------------------------------------------------------------------------------------------------------------------------------------------------------------------------------------------------------------------------------------------------------------------------------------------------------------------------------------------------------------------------------------------------------------------------------------------------------------------------------------------------------------------------------------------------------------------------------------------------------------------------------|
|  | <p>which means they presumably had had cervical cancer. They found that of the 1189 women in the final sample 68.5% had CCS in the previous year. There were differences in rates related to several sociodemographic variables as well as clinical care. The authors also found interprovincial differences.</p> <p>This was a worthwhile study to report CCS in a large cohort of woman with HIV who are a greater risk of cervical cancer. It would be helpful to know whether the authors think the women who volunteered to be part of the cohort are representative of women in Canada with HIV. How many women were invited to be part of the cohort and refused?</p> <p><b>We added a section on representativeness in the limitations section. Unfortunately, we do not have data on women who declined to participate.</b></p> <p>It would also be helpful to know how many of the women in the cohort had had an abnormal Pap smear previously because for these women followup would no longer be considered screening.</p> <p><b>Unfortunately, we do not have this data either.</b></p> <p>The provincial differences suggests that health providers in BC are doing something different than those in Ontario and Quebec or that the women are somehow different. An elaboration of this would be helpful for the paper.</p> <p><b>The interprovincial difference may be due to a difference in what providers do, in health care system, in public health promotion of cervical cancer screening or in characteristics of women. We expanded on all these possibilities in the discussion.</b></p> |
|--|--------------------------------------------------------------------------------------------------------------------------------------------------------------------------------------------------------------------------------------------------------------------------------------------------------------------------------------------------------------------------------------------------------------------------------------------------------------------------------------------------------------------------------------------------------------------------------------------------------------------------------------------------------------------------------------------------------------------------------------------------------------------------------------------------------------------------------------------------------------------------------------------------------------------------------------------------------------------------------------------------------------------------------------------------------------------------------------------------------------------------------------------------------------------------------------------------------------------------------------------------------------------------------------------------------------------------------------------------------------------------------------------------------------------------------------------------------------------------------------------------------------------------------------------------------------------------------------------------------------------|
